# Supplementary material for: Development of WO3–Nafion Based Membranes for Enabling Higher Water Retention at Low Humidity and Enhancing PEMFC Performance at Intermediate Temperature Operation
Source: MDPI journal article supplement (doi:10.3390/polym14122492), 2022-06-19
Supplement: s1 [file s1]

## Supporting Information

### Development of WO<sub>3</sub>-Nafion based membranes for enabling higher water retention at low humidity and enhancing PEMFC performance at intermediate temperature operation.

Asmaa Selim<sup>a,b</sup>, Gabor Szijjarto<sup>a</sup>, Loránd Románszki<sup>c</sup>, András Tompos<sup>a</sup>

*aRenewable Energy Group, Institute of Materials and Environmental Chemistry, Research Centre for Natural Sciences, H-1117 Budapest Magyar tudósok körútja2, Hungary*

*bChemical Engineering and pilot plant Department, Engineering and Renewable Energy Research Institute National Research Centre, 33 El Bohouth Street, 12622 Giza, Egypt*

*cFunctional Interfaces Research Group, Institute of Materials and Environmental Chemistry, Research Centre for Natural Sciences, H-1117 Budapest Magyar tudósok körútja2, Hungary*

#### **Contact angle results**

| sample type                | $\theta_a / ^\circ$                                                                          | $\theta_r / ^\circ$                                                                          |
|----------------------------|----------------------------------------------------------------------------------------------|----------------------------------------------------------------------------------------------|
| XL                         | 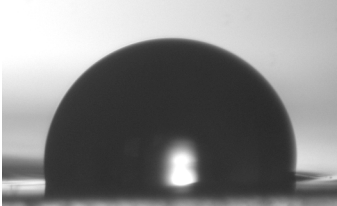<br>98.0    | <br>15.5   |
| rNF                        | <br>93.4    | <br>19.7   |
| rNF + 5% WO <sub>3</sub>   | <br>106.7   | <br>44.7   |
| rNF + 7.5% WO <sub>3</sub> | <br>109.3  | <br>46.8  |
| rNF + 10% WO <sub>3</sub>  | <br>107.2 | <br>48.2 |
| rNF + 15% WO <sub>3</sub>  | <br>97.6  | <br>33.0 |

**Figure S1.** Representative advancing ( $\theta_a$ ) and receding ( $\theta_r$ ) water contact angles of the membranes.

WO<sub>3</sub> is known to be hydrophilic, with reported (static) water contact angles ranging from 4 to 104°, typically around ~30° (Table S1).

**Table S1. Reported (static) water contact angles of different WO<sub>3</sub> layers**

| type                          | water CA<br>/° | remark                                                                          | ref                            |
|-------------------------------|----------------|---------------------------------------------------------------------------------|--------------------------------|
| sol-gel dip-coated            | 13–55          | in function of the annealing temp.                                              | Azimirad 2007; Naseri 2007     |
| sol-gel dip-coated            | 97–104         | 5-15 multilayer                                                                 | Raudonienė, 2018               |
| thermally evaporated film     | 4–57           | in function of the annealing temp.                                              | Azimirad 2007                  |
| sol-gel spin-coated           | 26–30          | further decreasing by long UV irradiation                                       | Miyauchi M 2009                |
| spray pyrolysis               | 28             | nanoporous layer                                                                | Vlauduta C, 2008; Enesca, 2008 |
| spray pyrolysis               | 58             | dense layer                                                                     | Vlauduta C, 2008; Enesca, 2008 |
| pulsed spray pyrolysis        | 30             |                                                                                 | Enesca, 2008                   |
| sol-gel spin-coated           | 21–92          | in function of the annealing temp.                                              | Hemati, 2013                   |
| sol-gel                       | 44             | after being annealed at 450 °C for 1 h                                          | Liu, 2018                      |
| spray pyrolysis               | 31             |                                                                                 | Vardhan, 2022                  |
| pulsed laser deposition       | 27–56          | depending on the process temperature                                            | Behbahani, 2013                |
| spray pyrolysis               | 6–7            |                                                                                 | Vardhan, 2020                  |
| sol-gel spin-coated           | 16–36          | on the top of VO <sub>2</sub> substrate layers; depending on process parameters | Top, 2018                      |
| reactive magnetron sputtering | 5–73           | depending on process temperature                                                | Ramana, 2020                   |

## References

1. Azimirad R, Naseri N, Akhavan O, Moshfegh AZ, Hydrophilicity variation of WO<sub>3</sub> thin films with annealing temperature, *J. Phys. D: Appl. Phys.* 40 (2007) 1134–1137.
2. Behbahani MA, Ranjbar M, Kameli P, Salamati H, Hydrogen sensing by wet-gasochromic coloring of PdCl<sub>2</sub>(aq)/WO<sub>3</sub> and the role of hydrophilicity of tungsten oxide films, *Sensors and Actuators B* 188 (2013) 127–136.
3. Enesca A, Duta A, Tailoring WO<sub>3</sub> thin layers using spray pyrolysis technique, *Phys. Stat. Sol. (c)* 5 (2008) 3499–3502.
4. Hemati A, Allaf B M, Ranjbar M, Kameli P, Salamati H, Gasochromic tungsten oxide films with PdCl<sub>2</sub> solution as an aqueous Hydrogen catalyst, *Solar Energy Materials & Solar Cells* 108 (2013) 105–112.
5. Liu Y, Yang Y, Liu Q, Li Y, Lin J, Li W, Li J, The role of water in reducing WO<sub>3</sub> film by hydrogen: Controlling the concentration of oxygen vacancies and improving the photoelectrochemical performance, *Journal of Colloid and Interface Science* 512 (2018) 86–95.
6. Miyauchi M, Shibuya M, Zhao ZG, Liu Z, Surface wetting behavior of a WO<sub>3</sub> electrode under light-irradiated or potential-controlled conditions, *J. Phys. Chem. C* 2009, 113, 10642–10646.
7. Naseri N, Azimirad R, Akhavan O, Moshfegh AZ, The effect of nanocrystalline tungsten oxide concentration on surface properties of dip-coated hydrophilic WO<sub>3</sub>–SiO<sub>2</sub> thin films, *J. Phys. D: Appl. Phys.* 40 (2007) 2089–2095.
8. Ramana CV, Battu AK, Dubey P, Lopez GA, Phase-control-enabled enhancement in hydrophilicity and mechanical toughness in nanocrystalline tungsten oxide films for energy-related applications, *ACS Appl. Nano Mater.* 2020, 3, 3264–3274.
9. Raudonienė J, Laurikenas A, Kaba MM, Sahin G, Morkan AU, Brazinskiene D, Asadauskas S, Seidu R, Kareiva A, Garskaite E, Textured WO<sub>3</sub> and WO<sub>3</sub>:Mo films deposited from chemical solution on stainless steel, *Thin Solid Films* 653 (2018) 179–187.

10. Top I, Binions R, Sol C, Papakonstantinou I, Holdynski M, Gaiaschi S, Abrahams I, Improved thermochromic properties in bilayer films of VO<sub>2</sub> with ZnO, SnO<sub>2</sub> and WO<sub>3</sub> coatings for energy efficient glazing, *J. Mater. Chem. C*, 2018, 6, 12555.
11. Vardhan RV, Kumar S, Mandal S, A facile, low temperature spray pyrolysed tungsten oxide (WO<sub>3</sub>): an approach to antifouling coating by amalgamating scratch resistant and water repellent properties, *Bull. Mater. Sci.* (2020) 43:281.
12. Vardhan RV, Kumar S, Mandal S, Fabrication of minimal capital-intensive scratch-resistant and hydrophobic tungsten oxide film on stainless steel through spray pyrolysis, *Surf Interface Anal.* 2022 1–14.
13. Vladuta C, Andronic L, Visa M, Duta A, Ceramic interface properties evaluation based on contact angle measurement, *Surface & Coatings Technology* 202 (2008) 2448–2452.
